# Supplementary material for: Home range and use of diurnal shelters by the Etendeka round-eared sengi, a newly discovered Namibian endemic desert mammal
Source: PeerJ. 2015 Oct 1;3:e1302. doi: 10.7717/peerj.1302 (PMC4636418; doi:10.7717/peerj.1302)
Supplement: Data S2 — Physical features associated with shelters used by radio tracked sengis. [file peerj-03-1302-s003.xls]

## Sheet: Sheet1
								Temperature					Measurements of shelter rock
ID	Shelter Date	Data Collection Date	Time	Observer	GPS Tx UTMe	GPS Tx UTMn	GPS Tx elevation[ m]	Shelter temp	air temp, sun [C]	air temp, shade	air temp - shelter temp	rock temp	Length [cm]	width [cm]	height [cm]	rock area [cm3]	shelter entrance [cm]	Direction (verbatim)	Direction (calculated)	sin(direction)	cos(direction)	Bedding?	Excavation?	feces?	substrate	aspect	sin(direction)	cos(direction)	slope	ground cover	ground cover	photos	Notes
4020	2014-10-01	2014-10-16	1899-12-31 13:15:00		429932	7641703	608	33.4	28.8	27.3	-6.1	44.7	26	22	9	5148	7	60	60	0.866025	0.5	n	n		coarse gravel	164	0.275637	-0.961262	7	50% rock	50	68-9
4020	2014-10-03	2014-10-16	1899-12-31 13:35:00		429926	7641702		32.5	29	27.3	-5.2	44.4	39	27	23	24219	4					n	n		gravel	150	0.5	-0.866025	7	50% rock, large boulders	50	74-5
4020	2014-10-05	2014-10-16	1899-12-31 12:49:00		429938	7641712	591	24.3	28.8	27.3	3	38.2	64	46	34	100096	5	338	338	-0.374607	0.927184	n	n		dust / fine gravel	164	0.275637	-0.961262	7	50% rock, many large boulders	50	62-4
4020	2014-10-06	2014-10-16	1899-12-31 13:00:00		429937	7641713		33	28.8	27.3	-5.7	44	39	33	18	23166	4	225 and 45 (two entrances)	45	0.707107	0.707107	n	n		dust	164	0.275637	-0.961262	7	50% rock, many large boulders	50	65-7
4020	2014-10-07	2014-10-16	1899-12-31 13:25:00		429932	7641706		27.9	29	27.3	-0.6	38.1	65	33	37	79365	6	multiple possible				n (some blown grasses, but not arranged)	n		gravel	160	0.34202	-0.939693	7.5	50% boulders	50	72-3
4020	2014-10-08	2014-10-16	1899-12-31 14:00:00		429903	7641713		33	28.8	27.3	-5.7	38.2	33	16	23	12144	7	120 and 300	300	-0.866025	0.5	n	n		dusty spot in gravel	200	-0.34202	-0.939693	8	> 50% rock	50	78-9
4020	2014-10-09			GBR	429904	7641729		39.4	30.8	28.5	-10.9	45.8	33	16	10	5280	3					n	n		dust	200	-0.34202	-0.939693	10			Jack
4020	2014-10-09			GBR	429904	7641717		32.5	30.8	28.5	-4	49.8	57	39	16	35568	9					n	n		dust		0	1
4020	2014-10-10			GBR	429899	7641747		36.1	30.8	28.5	-7.6	47.8	28	21	8	4704	6					n	n		gravel	270	-1	-1.83772e-16	10			jack
4020	2014-10-12	2014-10-16	13.43	jpd	429924	7641698		34.2	28.8	27.3	-6.9	39.4	28	27	15	11340	6	240	240	-0.866025	-0.5	n	n		dust / fine gravel	140	0.642788	-0.766044	8	50% rock	50	76-7
4020	2014-10-13			GBR	429888	7641745		33.5	30.8	28.5	-5	46.8	34	27	13	11934	6					n	n		gravel / dust	255	-0.965926	-0.258819	7			jack
4020	2014-10-14	2014-10-16	1899-12-31 12:35:00		429987	7641817		30.6	27	25	-5.6	36.2	22	16	10	3520	5	184	184	-0.0697565	-0.997564	n	n		fine gravel	129	0.777146	-0.62932	8	50% rock	50	61
4020	2014-10-15	2014-10-16	1899-12-31 13:15:00		429939	7641712		33.3	28.2	27.3	-6	41.3	31	35	15	16275	6	45	45	0.707107	0.707107	n	n		gravel / dust	150	0.5	-0.866025	8	50% rock	50	70-71
4254	2014-10-09	2014-10-25	1899-12-31 14:00:00	JPD	430677	7642079		39.6	33.6	30.4	-9.2	46.3	36	26	13	12168	7	225	225	-0.707107	-0.707107	n	n	n	dust / fine gravel	340	-0.34202	0.939693	19	50% rock	50	166-7
4254	2014-10-11	2014-10-26	1899-12-31 14:45:00	JPD	429655	7642695		35	32.4	31.7	-3.3	48.4	43	27	25	29025	6	330	330	-0.5	0.866025	n	n	n	fine gravel	90	1	6.12574e-17	15			184-5
4254	2014-10-14	2014-10-25	1899-12-31 13:55:00	JPD	430608	7642045		35.2	33.6	30.4	-4.8	45.1	40.5	28	9	10206	8	160	160	0.34202	-0.939693	n	n	n	gravel / dust	340	-0.34202	0.939693	9	40% Rock	40	164-5
4254	2014-10-16	2014-10-25	1899-12-31 13:00:00	GBR				33.2	33.6	30.4	-2.8	47.9	51	22	16	17952	6	160	160	0.34202	-0.939693	n	n	n	larger gravel	345	-0.258819	0.965926	29	80% Boulders	80	160-1
4254	2014-10-17	2014-10-26	1899-12-31 14:30:00	JPD	429693	7642649		35.3	32.4	31.7	-3.6	43.4	37	14	9	4662	7	225	225	-0.707107	-0.707107	n	n	n	gravel	90	1	6.12574e-17	16	40% Rock	40	182-3
4254	2014-10-18	2014-10-25	1899-12-31 14:13:00	JPD	430699	7642068		32.2	33.6	30.4	-1.8	46.2	36	29	19	19836	8	160	160	0.34202	-0.939693	n	n	n	gravel	340	-0.34202	0.939693	19	80% rock	80	170-1
4254	2014-10-19	2014-10-26	1899-12-31 09:40:00	GBR	429269	7642758		NoData	NoData	NoData		NoData	47	22	19	19646	3	280	280	-0.984808	0.173648	n	n	n	gravel	160	0.34202	-0.939693	20	40% Rock	40	SX10 numbers 2067-8
4254	2014-10-22	2014-10-26	1899-12-31 09:25:00	JPD	429394	7642674		NoData	NoData	NoData		NoData	33	25	27	22275	8	170	170	0.173648	-0.984808	n	n	n	gravel	240	-0.866025	-0.5	9	40% Rock	40	SX10 numbers 2064-5
4254	2014-10-23	2014-10-25	1899-12-31 14:07:00	JPD	430687	7642077		34.4	33.6	30.4	-4	43.7	47	30	21	29610	5	160	160	0.34202	-0.939693	n	n	n	dust / fine gravel	340	-0.34202	0.939693	19	50% rock	50	168-9
4612	2014-10-11	2014-10-26	1899-12-31 13:25:00		430714	7642074		30.6	30	28.8	-1.8	44.5	67	35	24	56280	10	180	180	1.22515e-16	-1	n	n	n	dust / some windblown grasses	315	-0.707107	0.707107	12	60% rock; mostly larger boulders	60	178-9
4612	2014-10-12	2014-10-26	1899-12-31 13:00:00		430503	7642083		34.4	30	28.8	-5.6	42.5	33	34	13	14586	6	180	180	1.22515e-16	-1	n	n	3 dung balls	dust / fine gravel	350	-0.173648	0.984808	20	50% rock	50	176-7
4612	2014-10-13	2014-10-25	1899-12-31 12:50:00		430462	7642071		38.2	33.6	30.4	-7.8	43.2	43	25	9	9675	3	160	160	0.34202	-0.939693	n	n	n	gravel / dust	300	-0.866025	0.5	22	65% rock	65	158-159
4612	2014-10-14	2014-10-25	1899-12-31 13:00:00		430467	7642034		31.5	33.6	30.4	-1.1	42.6	69	36	42	104328	7	100	100	0.984808	-0.173648	n	n	n	gravel	320	-0.642788	0.766044	22	50% Rock	50	162-163
4612	2014-10-15	2014-10-26	1899-12-31 13:50:00	JPD	430711	7642017		35.1	30	28.8	-6.3	45.2	67	52	23	80132	10	170	170	0.173648	-0.984808	n	n	n	Fine Sand	310	-0.766044	0.642788	8	40% rock	40	None
4856	2014-10-04	2014-10-18		jpd	429712	7642497		31.5	30.8	28	-3.5	51.4	36	12	10	4320	7	70	70	0.939693	0.34202	n	n	n	gravel	80	0.984808	0.173648	25	>50% rock	50	90-91
4856	2014-10-06	2014-10-18	1899-12-31 12:30:00		429713	7642418		37.9	30.8	28	-9.9	45.1	36	14	9	4536	5	160	160	0.34202	-0.939693	n	n	n	gravel	90	1	6.12574e-17	20	50% rock	50	84-5
4856	2014-10-07	2014-10-24	1899-12-31 12:20:00		429948	7642333		30.5	36.3	32.2	1.7	40.2	48	31	33	49104	9	280	280	-0.984808	0.173648	n	n	n	gravel	50	0.766044	0.642788	13	40% rock	40	150-1
4856	2014-10-08	2014-10-18	1899-12-31 14:15:00		429972	7642365		34.9	30.8	28	-6.9	45.8	35	42	13	19110	11	170	170	0.173648	-0.984808	n	n	n	rocky	70	0.939693	0.34202	19	50% rock	50	101-2
4856	2014-10-09	2014-10-18	1899-12-31 13:50:00		429817	7642389		33.2	30.8	28	-5.2	45.5	40	37	20	29600	12	210	210	-0.5	-0.866025	n	n	n	dust / rock	30	0.5	0.866025	20	65% rock	65	97-8
4856	2014-10-12	2014-10-18	1899-12-31 13:00:00		429727	7642444		33.3	30.8	28	-5.3	48.1	44	45	13	25740	7	330	330	-0.5	0.866025	Some grass, but looks windblown…	n	n	dust / gravel	80	0.984808	0.173648	20	50% Rock	50	88-9
4856	2014-10-15	2014-10-16	1899-12-31 12:50:00	GBR?				34.1	30.8	28	-6.1	48.3	42	17	22	15708	9	270	270	-1	-1.83772e-16	n	n	n	gravel	90	1	6.12574e-17	22	50% Rock	50	86-7
4856	2014-10-16	2014-10-18	1899-12-31 14:00:00		429795	7642380		33	30.8	28	-5	43.2	34	37	38	47804	8	200	200	-0.34202	-0.939693	n	n	n	dust	20	0.34202	0.939693	20	40% rock	40	99-100
4856	2014-10-20	2014-10-24	1899-12-31 12:57:00	GBR				34.2	36.3	32.2	-2	47.6	41	35	18	25830	6	330	330	-0.5	0.866025	n	n	n	gravel	70	0.939693	0.34202	18	50% rock	50	154-5
4856	2014-10-22	2014-10-24	1899-12-31 12:35:00	GBR	429824	7642378		32.2	36.3	32.2	0	44.7	40	34	16	21760	7	120	120	0.866025	-0.5	n	n	n	gravel / dust	30	0.5	0.866025	23	40% Rock	40	152-3
4856	2014-10-23	2014-10-24	1899-12-31 13:08:00	GBR				35.1	36.3	32.2	-2.9	44.8	33	30	17	16830	10	270	270	-1	-1.83772e-16	n	n	n	gravel / dust	90	1	6.12574e-17	24	50% rock	50	156-7
4947	2014-10-08	2014-10-23	1899-12-31 12:27:00	GBR?				32	32.5	29.8	-2.2	41.5	111	79	43	377067	9	120	120	0.866025	-0.5	n	n	n	dust dusty	240	-0.866025	-0.5	7	50% rock	50	126-127
4947	2014-10-09	2014-10-23	1899-12-31 13:25:00		429878	7642066		34.7	32.5	29.8	-4.9	44.8	32	20	5	3200	3	330	330	-0.5	0.866025	n	n	n	coarse gravel	230	-0.766044	-0.642788	14	50% rock	50	136-137
4947	2014-10-10	2014-10-23	1899-12-31 12:50:00		429846	7642092		35.5	32.5	29.8	-5.7	44.8	28	27	13	9828	5					n	n	n	gravel	240	-0.866025	-0.5	7	50% rock	50	130-131
4947	2014-10-13	2014-10-23		GBR?				34.3	31.4	28.8	-5.5	43.7	51	36	25	45900	6	160	160	0.34202	-0.939693	some grass	n	n	gravel	235	-0.819152	-0.573576	9	40% Rock	40	132-133	Some of those little beehive things
4947	2014-10-14	2014-10-23						35.5	31.4	28.8	-6.7	42.2	28	19	12	6384	9	185 and 330	185	-0.0871557	-0.996195	n	n	n	gravel	210	-0.5	-0.866025	4.5	80% rock	80	144-145
4947	2014-10-15	2014-10-23	1899-12-31 14:00:00	GBR				37	31.4	28.8	-8.2	45.4	30	20	11	6600	5	330	330	-0.5	0.866025	n	n	n	dust / rock	225	-0.707107	-0.707107	3.3	95% rock	95	142-143
4947	2014-10-16	2014-10-23	1899-12-31 12:40:00	GBR	429838	7642087		37	31.4	28.8	-8.2	41.8	26	19	10	4940	5					n	n	n	gravel	240	-0.866025	-0.5	7	50% rock	50	128-129
4947	2014-10-17	2014-10-23	1899-12-31 13:28:00		429877	7642033		37.8	31.4	28.8	-9	49.3	32	23	7	5152	6	230	230	-0.766044	-0.642788	n	n	n	gravel	210	-0.5	-0.866025	13	50% rock	50	138-139
4947	2014-10-19	2014-10-23	1899-12-31 14:20:00	JPD	429836	7641929		37.3	31.4	28.8	-8.5	44.8	33	26	9	7722	6	multiple possible				n	n	n	dust	250	-0.939693	-0.34202	6	60% rock	60	146-7
4947	2014-10-21	2014-10-23	1899-12-31 13:45:00	GBR				37.6	32.5	28.8	-8.8	42.4	31	25	9	6975	7	230	230	-0.766044	-0.642788	n	n	n	Fine Gravel	225	-0.707107	-0.707107	6.5	75% rock	75	140-141
4947	2014-10-22	2014-10-23	1899-12-31 13:07:00		429829	7642088		35.5	32.5	28.8	-6.7	42.9	21	18	7	2646	5	125	125	0.819152	-0.573576	n	n	n	fine gravel	220	-0.642788	-0.766044	10	40% rock	40	134-135
							min	24.3	27	25	-10.9	36.2	21	12	5	2646	3
							max	39.6	36.3	32.2	3	51.4	111	79	43	377067	12
							average	34.0957	31.534	29.034	-5.0617	44.2979	40.8265	28.7551	17.551	30610.1	6.63265
							stdev	2.83134	2.19627	1.60628	2.94497	3.21684	15.645	11.6091	9.52423	56067.5	2.09855
